# Supplementary material
Source: PubMed Central journal article supplement (PMC6895523)
Supplement: ajtr0011-6826-f9.pdf [file ajtr0011-6826-f9.pdf]

## The role of miR-761 in PTC

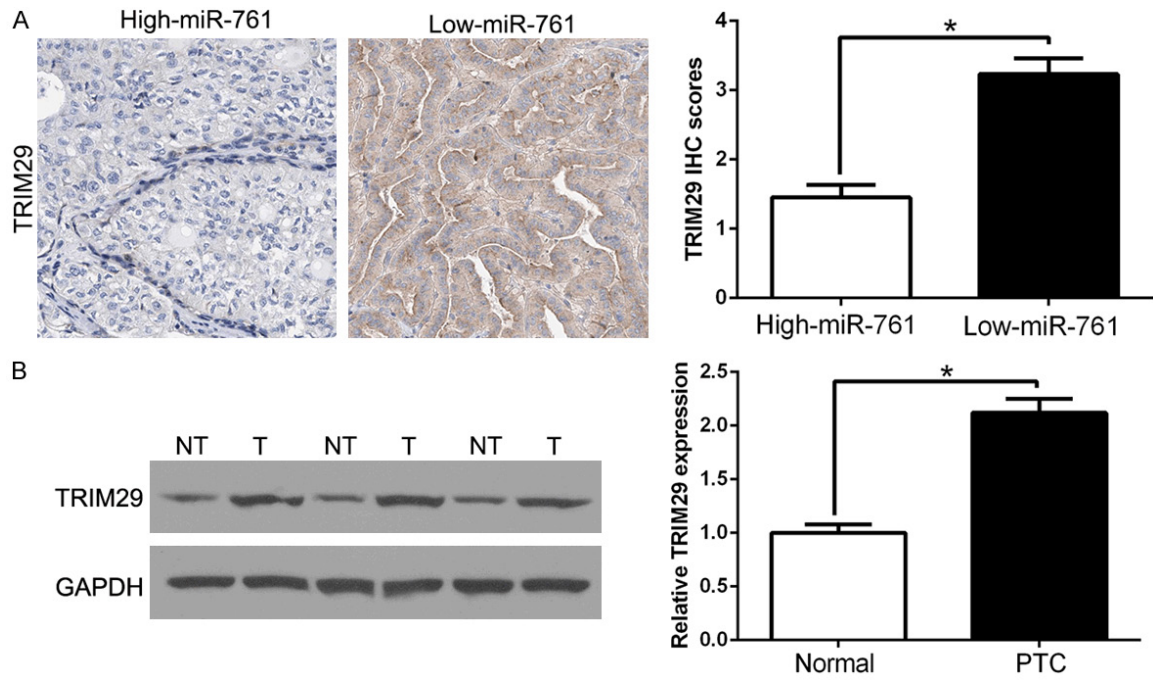

**Figure S1.** The expression of TRIM29 in PTC tissues. A. IHC staining of TRIM29 showed that the expression of TRIM29 in high-miR-761 group was lower than that in low-miR-761 expression group. B. TRIM29 was up-regulated in cancer tissues compared to the normal tissues. \*P < 0.05.
